# Supplementary material for: Selective mass spectrometric analysis of thiols using charge-tagged disulfides
Source: Royal Society of Chemistry journal article supplement (doi:10.1039/c6an01210h), 2016-01-01
Supplement: c6an01210h1.pdf [file c6an01210h1.pdf]

**Selective mass spectrometric analysis of thiols using charge-tagged disulfides**

**Supporting Information**

Eric Janusson, G. Bryce McGarvey, Christine Rowan and J. Scott McIndoe\*

*Department of Chemistry, University of Victoria, P.O. Box 3065 Victoria, BC V8W3V6, Canada.*

*Fax: +1 (250) 721-7147; Tel: +1 (250) 721-7181; E-mail: mcindoe@uvic.ca*

---

## List of Compounds by Number

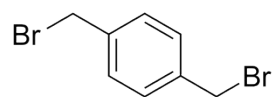

1

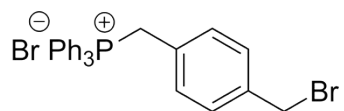

2

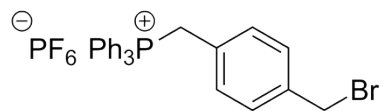

3

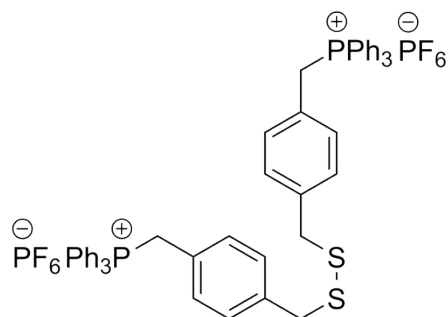

4

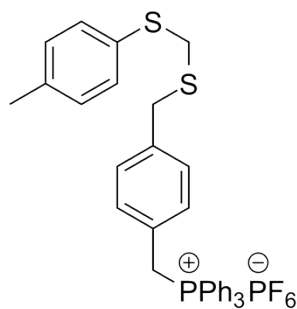

5

Figure S1. List of relevant species by number (as they appear in the main body of the manuscript)

## Instrumental Parameters

Table S1: Complete list of QTOF Micro Quadrupole parameters

|                             |             |
|-----------------------------|-------------|
| <b>Ion Energy (V)</b>       | <b>2.0</b>  |
| <b>Collision Energy</b>     | 2.0         |
| <b>Low mass resolution</b>  | 4.1         |
| <b>High mass resolution</b> | 4.2         |
| <b>RF Lens 1</b>            | 0.4         |
| <b>Pre/Post Filter</b>      | 4.8         |
| <b>RF Lens 2</b>            | 5.5         |
| <b>Aperture (V)</b>         | 6.1         |
| <b>Set mass</b>             | 0.0         |
| <b>Plate one</b>            | 1.1         |
| <b>Entrance</b>             | 110.0       |
| <b>Gas cell RF</b>          | 600.0       |
| <b>Can</b>                  | 0.0         |
| <b>Plate two</b>            | -3.2        |
| <b>Pusher cycle time</b>    | Auto (47.0) |
| <b>Pusher frequency</b>     | 21276.60    |

Table S2: Complete list of QTOF Micro TOF parameters

|                            |              |
|----------------------------|--------------|
| <b>Acceleration (V)</b>    | <b>200.0</b> |
| <b>Focus (V)</b>           | 0.0          |
| <b>Steering (V)</b>        | 1.5          |
| <b>Tube Lens (V)</b>       | 76.0         |
| <b>Grid 2 (V)</b>          | 0.0          |
| <b>TOF Flight Tube (V)</b> | 5630.0       |
| <b>Reflectron (V)</b>      | 1780.0       |
| <b>Pusher offset</b>       | 0.0          |
| <b>Pusher</b>              | 818.0        |
| <b>Puller</b>              | 634.7        |

Table S3: Complete list of QTOF Micro TDC parameters

|                      |             |
|----------------------|-------------|
| <b>Inhibit Push</b>  | <b>13.0</b> |
| <b>Np Multiplier</b> | 0.70        |
| <b>Resolution</b>    | 5000.0      |
| <b>Lteff</b>         | 1080.00     |
| <b>Veff</b>          | 5630.00     |

# NMR Data

This report was created by ACD/NMR Processor Academic Edition. For more information go to [www.acdlabs.com/nmrproc/](http://www.acdlabs.com/nmrproc/)

|                        |                      |                   |                                        |                        |                      |
|------------------------|----------------------|-------------------|----------------------------------------|------------------------|----------------------|
| Acquisition Time (sec) | 3.4166               | Comment           | EJ - 100915 - Pure Br-Phosphonium Salt | Date                   | 10 Sep 2015 15:21:52 |
| Date Stamp             | 10 Sep 2015 15:21:52 |                   |                                        |                        |                      |
| Frequency (MHz)        | 300.27               | Nucleus           | <sup>1</sup> H                         | Number of Transients   | 16                   |
| Original Points Count  | 16384                | Owner             | av300user                              | Points Count           | 16384                |
| Receiver Gain          | 203.00               | SW(cyclical) (Hz) | 4795.40                                | Solvent                | CHLOROFORM-d         |
| Spectrum Offset (Hz)   | 1800.8390            | Spectrum Type     | STANDARD                               | Sweep Width (Hz)       | 4795.10              |
|                        |                      |                   |                                        | Temperature (degree C) | 27.000               |

<sup>1</sup>H NMR (300 MHz, CHLOROFORM-d)  $\delta$  ppm 4.39 (s, 2 H) 4.57 (d, J=14.05 Hz, 2 H) 6.89 (dd, J=8.20, 2.34 Hz, 2 H) 7.18 (d, J=7.90 Hz, 2 H) 7.44 - 7.85 (m, 16 H)

First Product - HNMR - -100915-Br-498PPh3.001.001.1r.esp

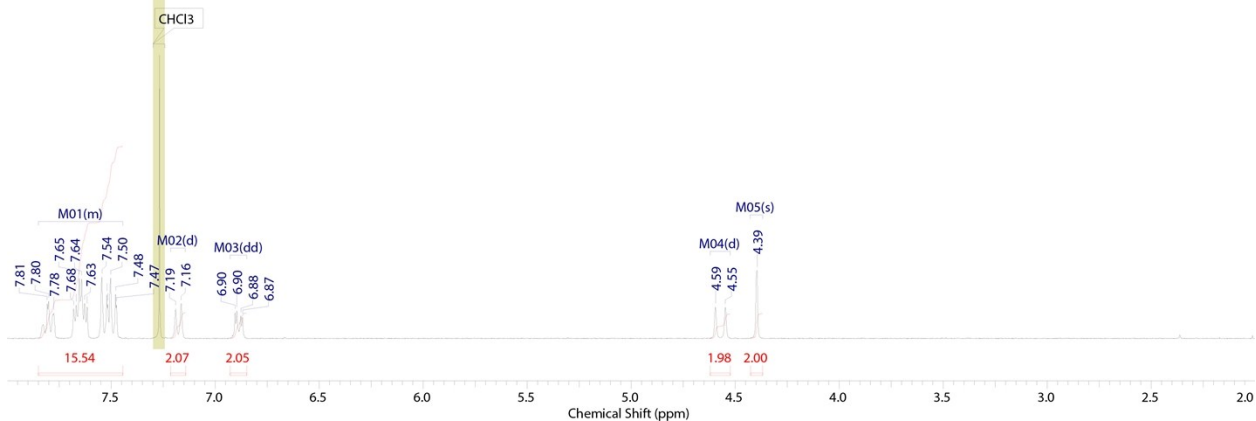

| No. | (ppm)          | Annotation | Layer No. | Created By | Created At                | Modified By | Modified At                |
|-----|----------------|------------|-----------|------------|---------------------------|-------------|----------------------------|
| 1   | [1.47 .. 1.63] | Water      | 1         | Eric       | Mon 14/09/2015 2:18:36 PM | Eric        | Tue 15/09/2015 10:50:49 AM |
| 2   | [7.24 .. 7.30] | CHCl3      | 1         | Eric       | Mon 14/09/2015 2:18:48 PM | Eric        | Tue 15/09/2015 10:57:27 AM |

| No. | Shift1 (ppm) | H's | Type | J (Hz)     | Multiplet1 | (ppm)          | No. | (ppm)              | Value         | Absolute Value | Non-Negative Value |
|-----|--------------|-----|------|------------|------------|----------------|-----|--------------------|---------------|----------------|--------------------|
| 1   | 4.39         | 2   | s    | -          | M05        | [4.37 .. 4.43] | 1   | [4.3678 .. 4.4220] | 0.00000000    | 5.78073800e+6  | 2.00000000         |
| 2   | 4.57         | 2   | d    | 14.05      | M04        | [4.52 .. 4.62] | 2   | [4.5238 .. 4.6191] | 1.97551250    | 5.70996000e+6  | 1.97551250         |
| 3   | 6.89         | 2   | dd   | 8.20, 2.34 | M03        | [6.85 .. 6.93] | 3   | [6.8483 .. 6.9220] | 5.91307150e+6 | 5.91307150e+6  | 2.04578424         |
| 4   | 7.18         | 2   | d    | 7.90       | M02        | [7.14 .. 7.21] | 4   | [7.1421 .. 7.2120] | 2.07188320    | 5.98850700e+6  | 2.07188320         |
| 5   | 7.62         | 16  | m    | -          | M01        | [7.44 .. 7.85] | 5   | [7.4431 .. 7.8415] | 5.53992558    | 4.49161200e+7  | 15.53992558        |

Figure S2. 300 MHz Proton NMR report of **(3)**; 4-(bromomethyl)benzyltriphenylphosphonium hexafluorophosphate

This report was created by ACD/NMR Processor Academic Edition. For more information go to [www.acdlabs.com/nmrproc/](http://www.acdlabs.com/nmrproc/)

|                        |                      |                   |                                        |                        |                      |
|------------------------|----------------------|-------------------|----------------------------------------|------------------------|----------------------|
| Acquisition Time (sec) | 1.3369               | Comment           | EJ - 100915 - Pure Br-Phosphonium Salt | Date                   | 10 Sep 2015 15:30:24 |
| Date Stamp             | 10 Sep 2015 15:30:24 |                   |                                        |                        |                      |
| Frequency (MHz)        | 121.55               | Nucleus           | 31P                                    | Number of Transients   | 128                  |
| Original Points Count  | 65536                | Owner             | av300user                              | Points Count           | 32768                |
| Receiver Gain          | 203.00               | SW(cyclical) (Hz) | 49019.61                               | Solvent                | CHLOROFORM-d         |
| Spectrum Offset (Hz)   | 1950.9169            | Spectrum Type     | STANDARD                               | Sweep Width (Hz)       | 49018.11             |
|                        |                      |                   |                                        | Temperature (degree C) | 27.000               |

$^{31}\text{P}$  NMR (122 MHz, CHLOROFORM- $d$ )  $\delta$  ppm -144.24 (spt, J=712.10 Hz, 1 P) 22.65 (s, 119 P)

First Product M01 NMR - EJ-100915-Br-498PPh3.002.001.1r.esp

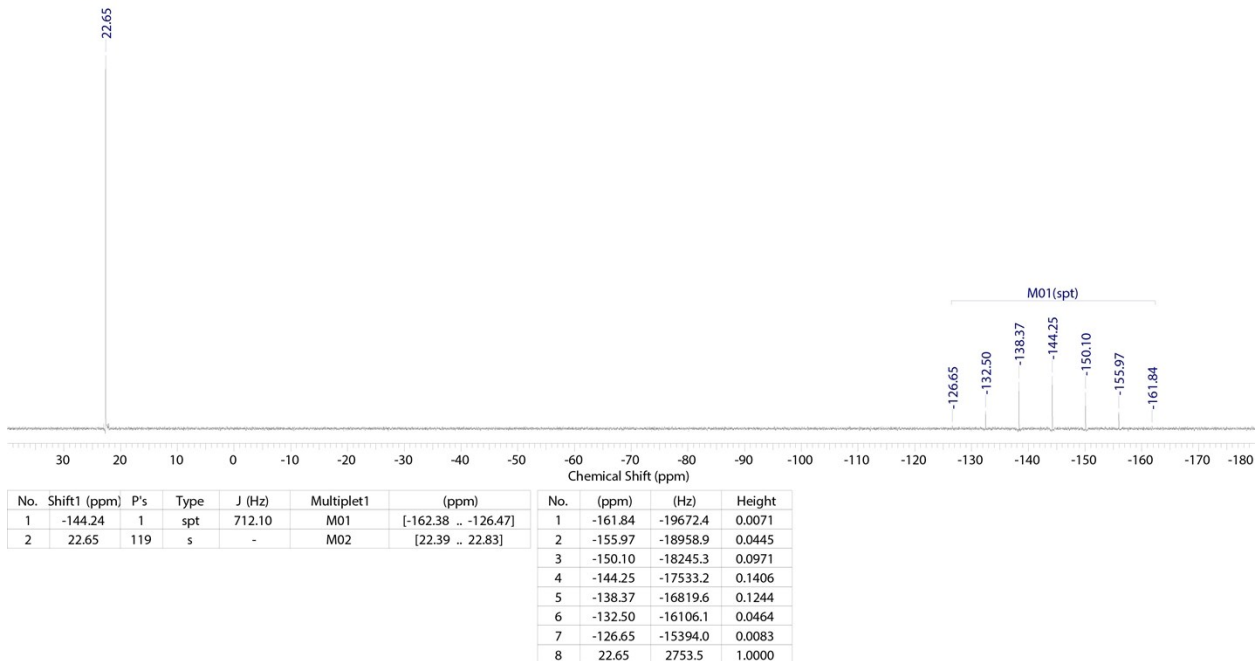

Figure S3. 300 MHz  $^{31}\text{P}$  NMR of **(3)** (4-(bromomethyl)benzyl)triphenylphosphonium hexafluorophosphate

This report was created by ACD/NMR Processor Academic Edition. For more information go to [www.acdlabs.com/nmrproc/](http://www.acdlabs.com/nmrproc/)

|                        |                      |                   |                                   |                        |                      |
|------------------------|----------------------|-------------------|-----------------------------------|------------------------|----------------------|
| Acquisition Time (sec) | 3.4166               | Comment           | EJ - 251114 - 498DS (Large Batch) | Date                   | 25 Nov 2014 17:36:00 |
| Date Stamp             | 25 Nov 2014 17:36:00 |                   |                                   |                        |                      |
| Frequency (MHz)        | 300.27               | Nucleus           | <sup>1</sup> H                    | Number of Transients   | 16                   |
| Original Points Count  | 16384                | Owner             | av300user                         | Points Count           | 16384                |
| Receiver Gain          | 203.00               | SW(cyclical) (Hz) | 4795.40                           | Solvent                | CHLOROFORM-d         |
| Spectrum Offset (Hz)   | 1800.8390            | Spectrum Type     | STANDARD                          | Sweep Width (Hz)       | 4795.10              |
|                        |                      |                   |                                   | Temperature (degree C) | 27.000               |

<sup>1</sup>H NMR (300 MHz, CHLOROFORM-d)  $\delta$  ppm 4.59 (d, J=14.34 Hz, 2 H) 7.42 - 7.85 (m, 20 H)

EJ-251114-498DS.001.001

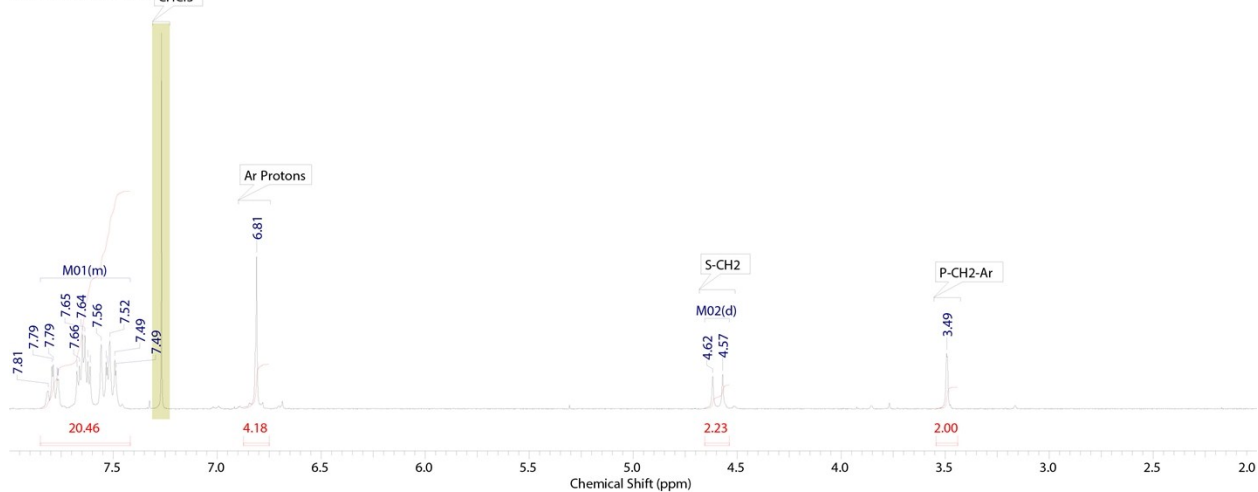

| No. | (ppm)          | Annotation | Layer No. | Created By | Created At                 | Modified By | Modified At |
|-----|----------------|------------|-----------|------------|----------------------------|-------------|-------------|
| 1   | [3.43 .. 3.55] | P-CH2-Ar   | 1         | Eric       | Thu 27/11/2014 11:59:21 AM |             |             |
| 2   | [4.51 .. 4.68] | S-CH2      | 1         | Eric       | Thu 27/11/2014 12:00:18 PM |             |             |
| 3   | [6.74 .. 6.90] | Ar Protons | 1         | Eric       | Thu 27/11/2014 12:08:03 PM |             |             |
| 4   | [7.23 .. 7.31] | CHCl3      | 1         | Eric       | Thu 27/11/2014 9:49:50 AM  |             |             |

| No. | Shift1 (ppm) | H's | Type | J (Hz) | Multiplet1 | (ppm)          | No. | (ppm)             | Value       | Absolute Value | Non-Negative Value |
|-----|--------------|-----|------|--------|------------|----------------|-----|-------------------|-------------|----------------|--------------------|
| 1   | 4.59         | 2   | d    | 14.34  | M02        | [4.54 .. 4.66] | 1   | [3.4397 .. 3.542] | 2.00000000  | 5.22331350e+6  | 2.00000000         |
| 2   | 7.65         | 20  | m    | -      | M01        | [7.42 .. 7.85] | 2   | [4.5381 .. 4.652] | 2.2606540   | 5.81371900e+6  | 2.22606540         |
|     |              |     |      |        |            |                | 3   | [6.7497 .. 6.874] | 4.1811277   | 1.09196310e+7  | 4.18111277         |
|     |              |     |      |        |            |                | 4   | [7.4182 .. 7.842] | 20.45514679 | 5.34218200e+7  | 20.45514679        |

Figure S4. 300 MHz Proton NMR of compound (4)

This report was created by ACD/NMR Processor Academic Edition. For more information go to [www.acdlabs.com/nmrproc/](http://www.acdlabs.com/nmrproc/)

|                        |                      |                        |                                   |                       |                      |
|------------------------|----------------------|------------------------|-----------------------------------|-----------------------|----------------------|
| Acquisition Time (sec) | 1.3369               | Comment                | EJ - 251114 - 498DS (Large Batch) | Date                  | 25 Nov 2014 17:42:24 |
| Date Stamp             | 25 Nov 2014 17:42:24 |                        |                                   |                       |                      |
| Nucleus                | 31P                  | Number of Transients   | 128                               | Origin                | spect                |
| Owner                  | av300user            | Points Count           | 32768                             | Pulse Sequence        | zpgpg30              |
| SW(cyclical) (Hz)      | 49019.61             | Solvent                | CHLOROFORM-d                      | Spectrum Offset (Hz)  | 1950.9169            |
| Sweep Width (Hz)       | 49018.11             | Temperature (degree C) | 27.000                            | Frequency (MHz)       | 121.55               |
|                        |                      |                        |                                   | Original Points Count | 65536                |
|                        |                      |                        |                                   | Receiver Gain         | 203.00               |
|                        |                      |                        |                                   | Spectrum Type         | STANDARD             |

<sup>31</sup>P NMR (122 MHz, CHLOROFORM-d) δ ppm -145.64 (m, J=713.60, 713.60, 713.60, 713.60, 713.60, 713.60 Hz, 15 P)

EJ-251114-498DS - 31P NMR.esp

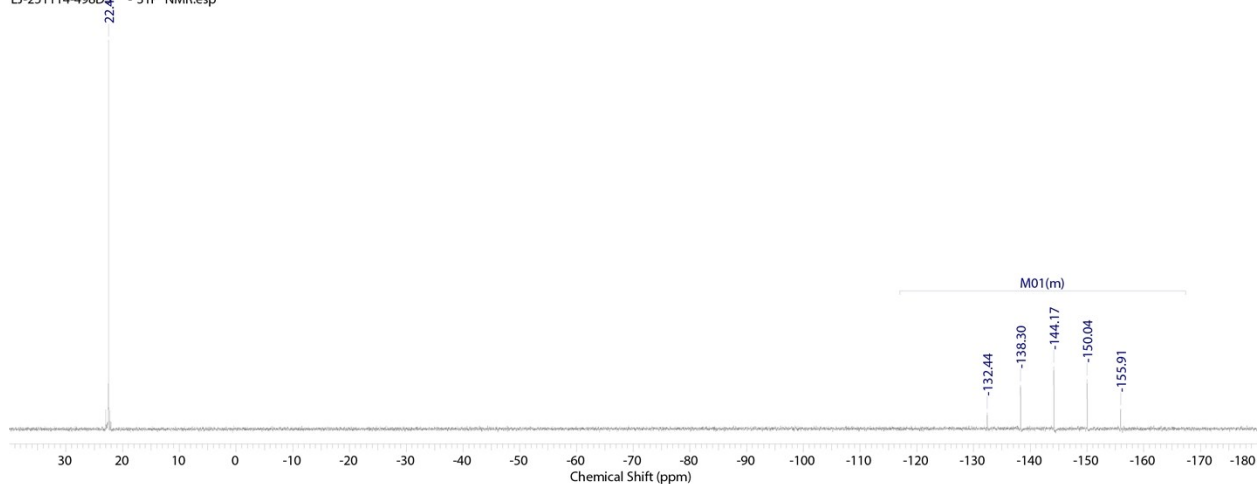

| No. | Shift1 (ppm) | P's | Type | J (Hz) | Multiplet1 | (ppm)                | No. | (ppm)   | (Hz)     | Height |
|-----|--------------|-----|------|--------|------------|----------------------|-----|---------|----------|--------|
| 1   | -145.64      | 15  | m    | 713.60 | M01        | [-167.35 .. -117.02] | 1   | -155.91 | -18951.4 | 0.0521 |
|     |              |     |      |        |            |                      | 2   | -150.04 | -18237.8 | 0.1279 |
|     |              |     |      |        |            |                      | 3   | -144.17 | -17524.2 | 0.1612 |
|     |              |     |      |        |            |                      | 4   | -138.30 | -16810.7 | 0.1135 |
|     |              |     |      |        |            |                      | 5   | -132.44 | -16098.6 | 0.0430 |
|     |              |     |      |        |            |                      | 6   | 22.48   | 2732.6   | 1.0000 |

Figure S5. 300 MHz <sup>31</sup>P NMR of compound (4)

## ESI-QTOF MS Data

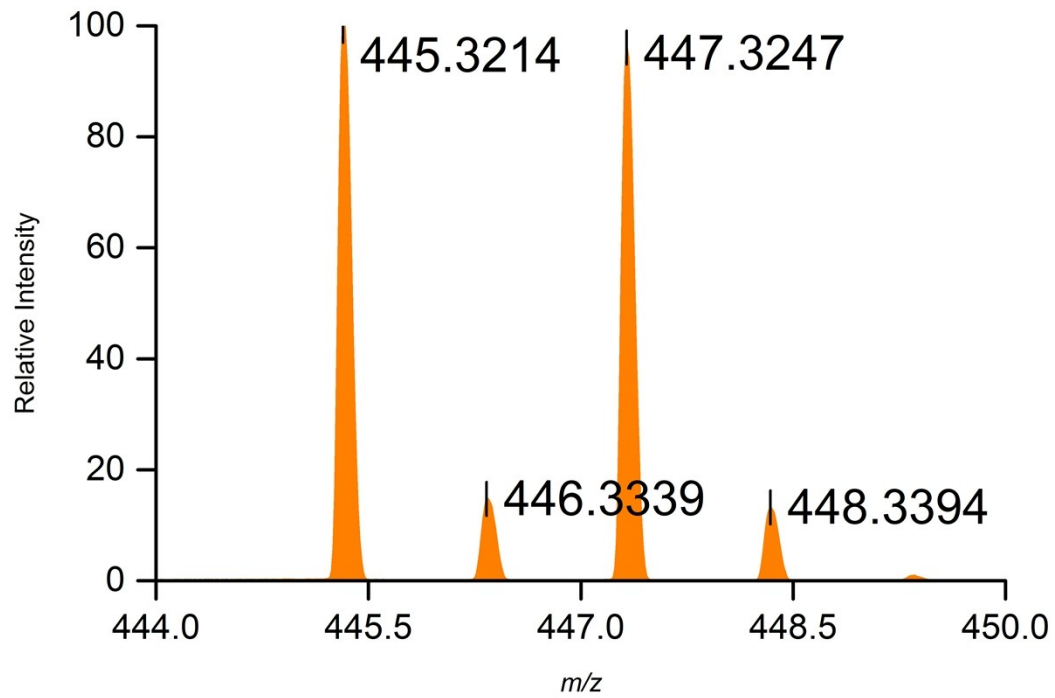

Figure S6. Positive-ion ESI-MS of (4-(bromomethyl)benzyl)triphenylphosphonium hexafluorophosphate



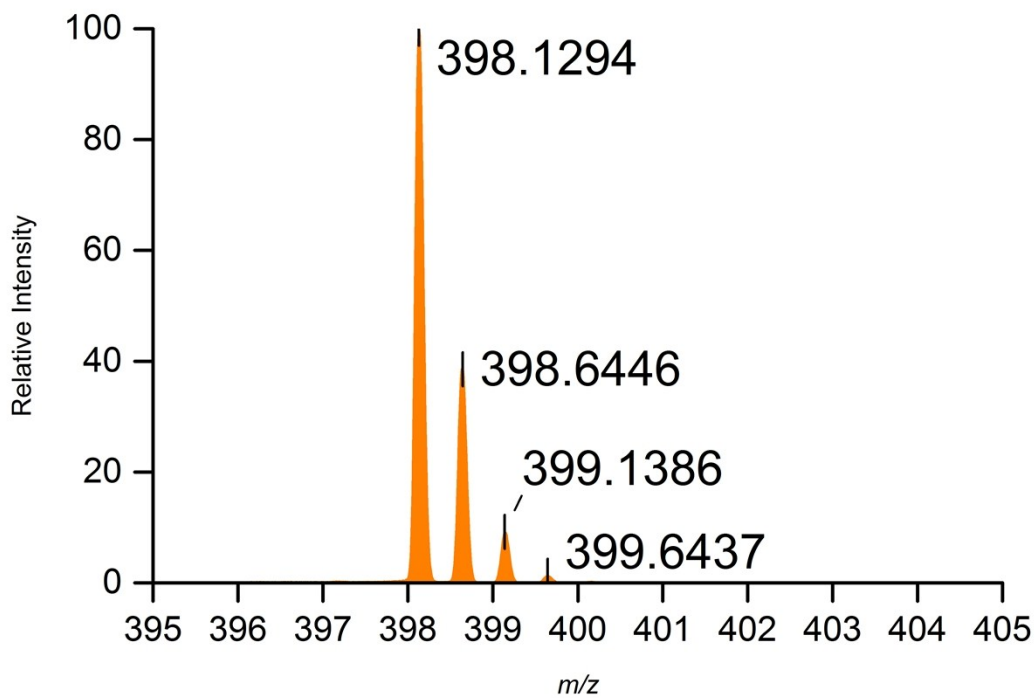

Figure S7. Positive-ion ESI-MS of the charge-tagged disulfide

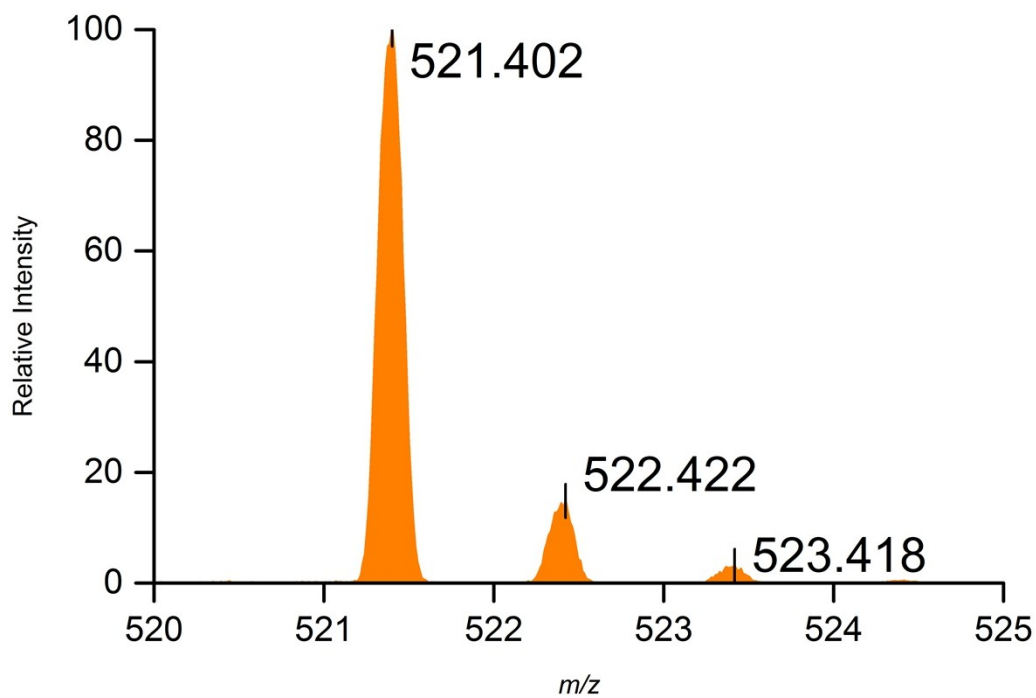

Figure S8. Positive-ion ESI-MS of the mixture of charge-tag and 4-methylbenzenethiol

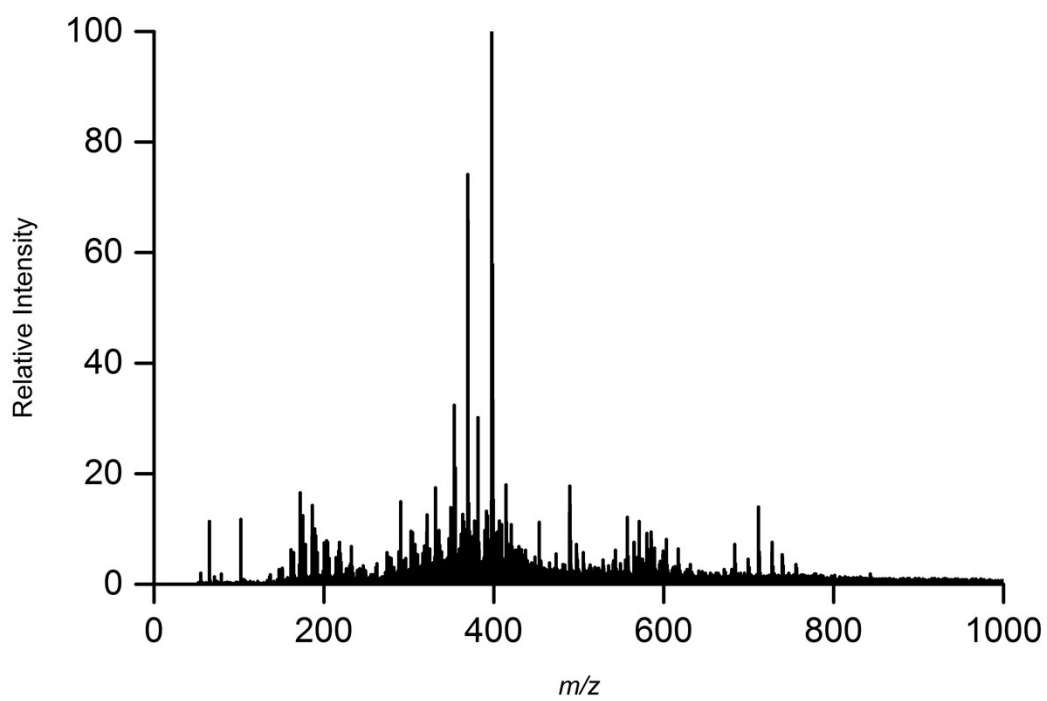

Figure S9. Positive ion ESI-MS of the mixture of charge-tagged disulfide and Basra crude petroleum

## MSMS Data

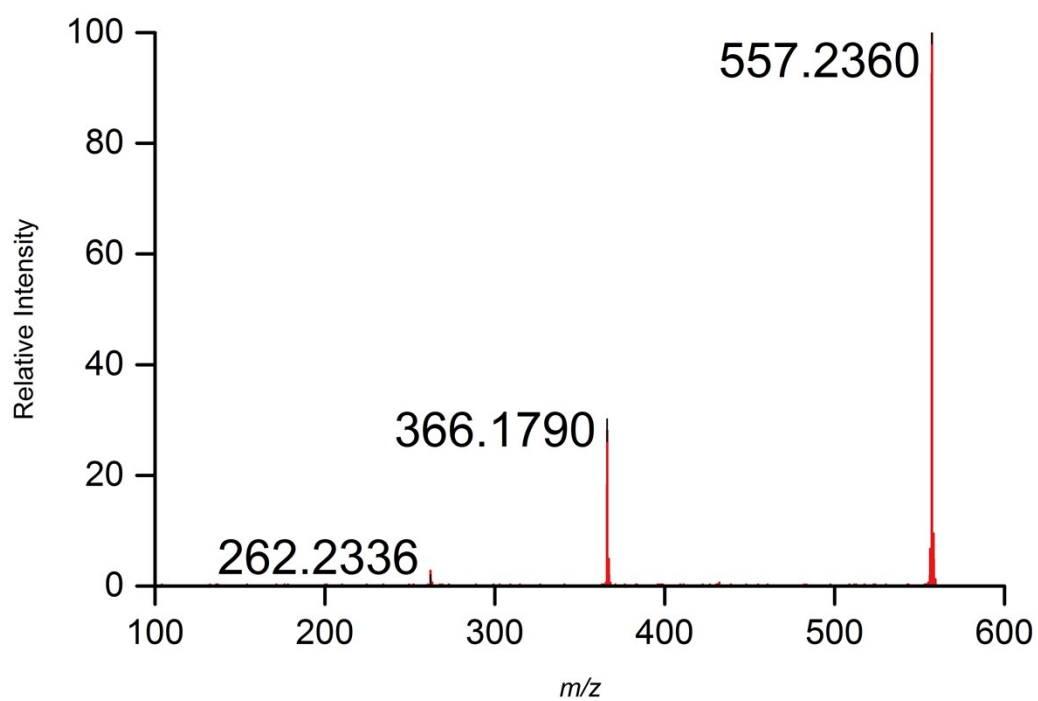

Figure S10. MSMS of nonane-1-thiol derivative with 498DS in "Sample A" (NAN-130 77229)

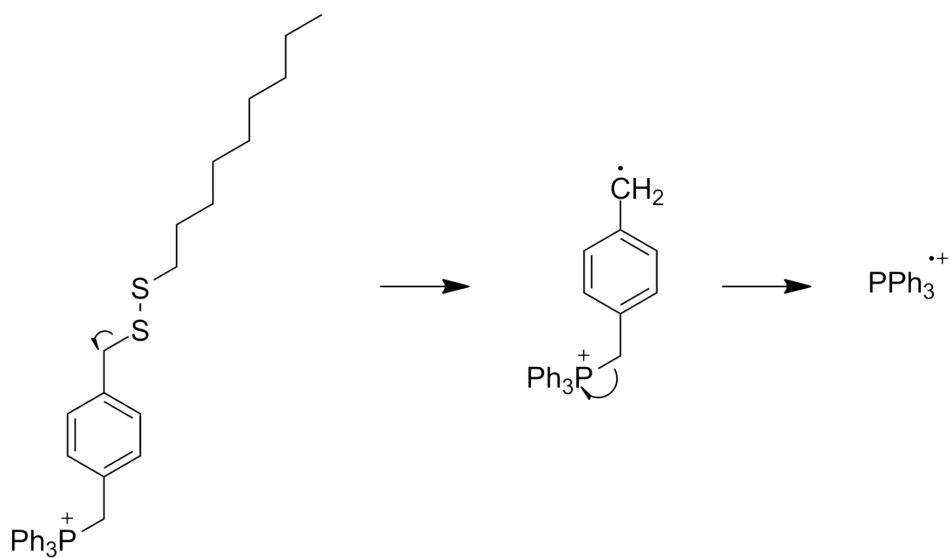

Figure S11. Fragmentation pattern using nonane-1-thiol as an example

## Limit of Detection

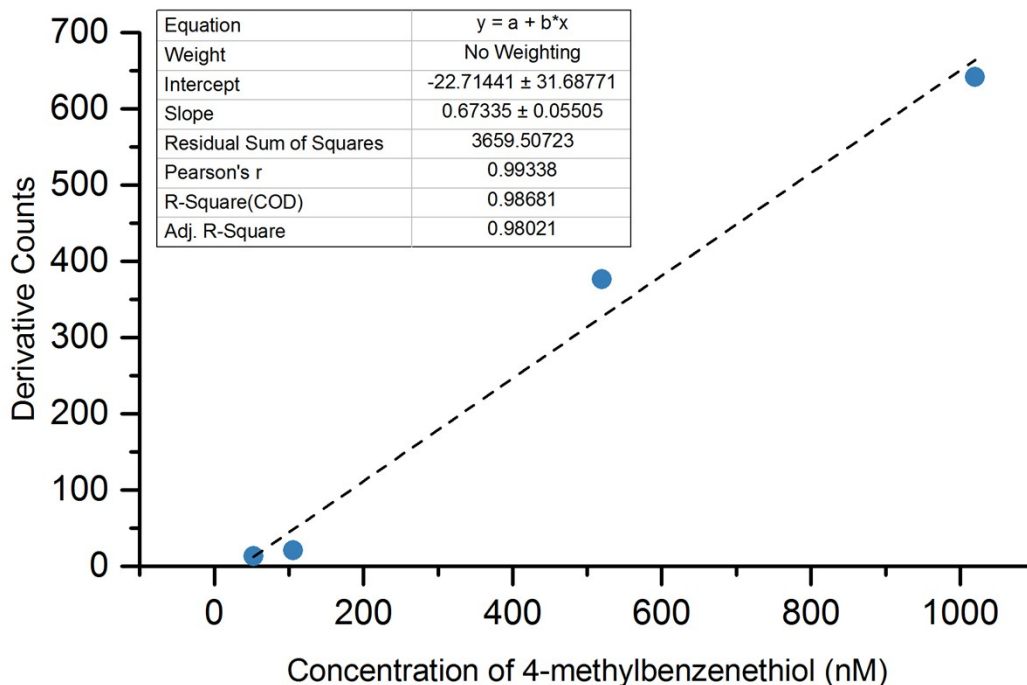

Figure S12. Response of derivative **(5)** following thiol-disulfide exchange reaction with 2.0  $\mu\text{M}$  compound **(4)**

The average baseline noise was determined with a method blank sample including ethanol and 2.0  $\mu\text{M}$  of compound **(4)**. The two samples analyzed in this manuscript did not exhibit significant background noise at the region of interest (that is, above  $m/z$  400 and below  $m/z$  2000). The response of derivative compound **(5)** was found to be linear for nano- to micromolar quantities of 4-methylbenzenethiol (Figure S10). The derivatization process is limited by the reactivity and concentration of target analytes in addition to variations in the sample matrix; therefore, the method detection limit defined here is an approximation only and will vary between samples and matrices. The general method detection limit was established based on a reaction with 2.0  $\mu\text{M}$  of compound **(4)** and 4-methylbenzenethiol as an archetypal thiol (see Equation 1 in the main body of the paper). The response of the lowest identifiable derivative, **(5)**, was then used to establish the limit detection (3 times the signal-to-noise ratio) and quantitation (10 times the signal-to-noise ratio) for the jet fuel samples. The limit of detection for **(5)** was examined and found to be 39 counts (1.2 ng/L) with a limit of quantitation of 130 counts (4.0 ng/L).
